# Supplementary material
Source: Springer Nature journal article supplement (https://www.springermedizin.de/resource/supplementary/12879_2005_329_MOESM3_ESM.pdf/9448790)

Categories

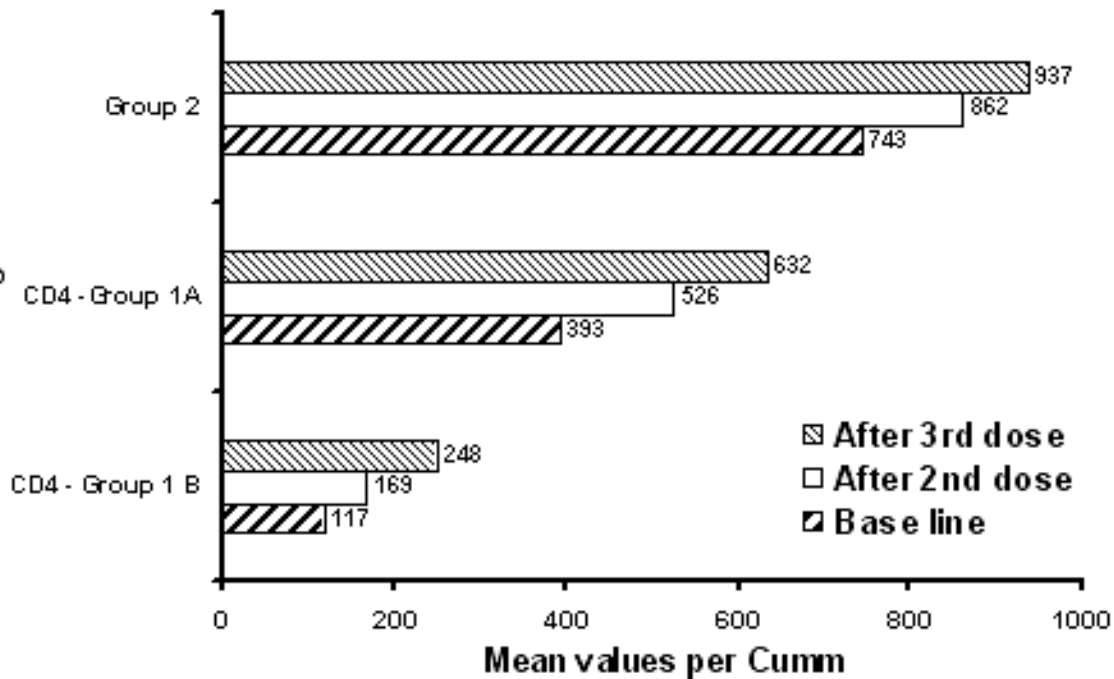

Supplement: MOESM3 [file 9448790]
